# Supplementary material
Source: PubMed Central journal article supplement (PMC4359965)
Supplement: NIHMS651377-supplement-1.pdf [file NIHMS651377-supplement-1.pdf]

## **Supplemental Data**

Yi Shen, Jun Ma, Ruilan Yan, Hongyan Ling, Xiaoning Li, Wancai Yang, John Gao, Chenfei Huang, Yiwen Bu, Yingchun He, Laxiang Wan, Mei Chris Huang, William F Stenson, Duanfang Liao, and Deliang Cao

**Figures S1-6**

**Tables S1-7**

**Figure S1**

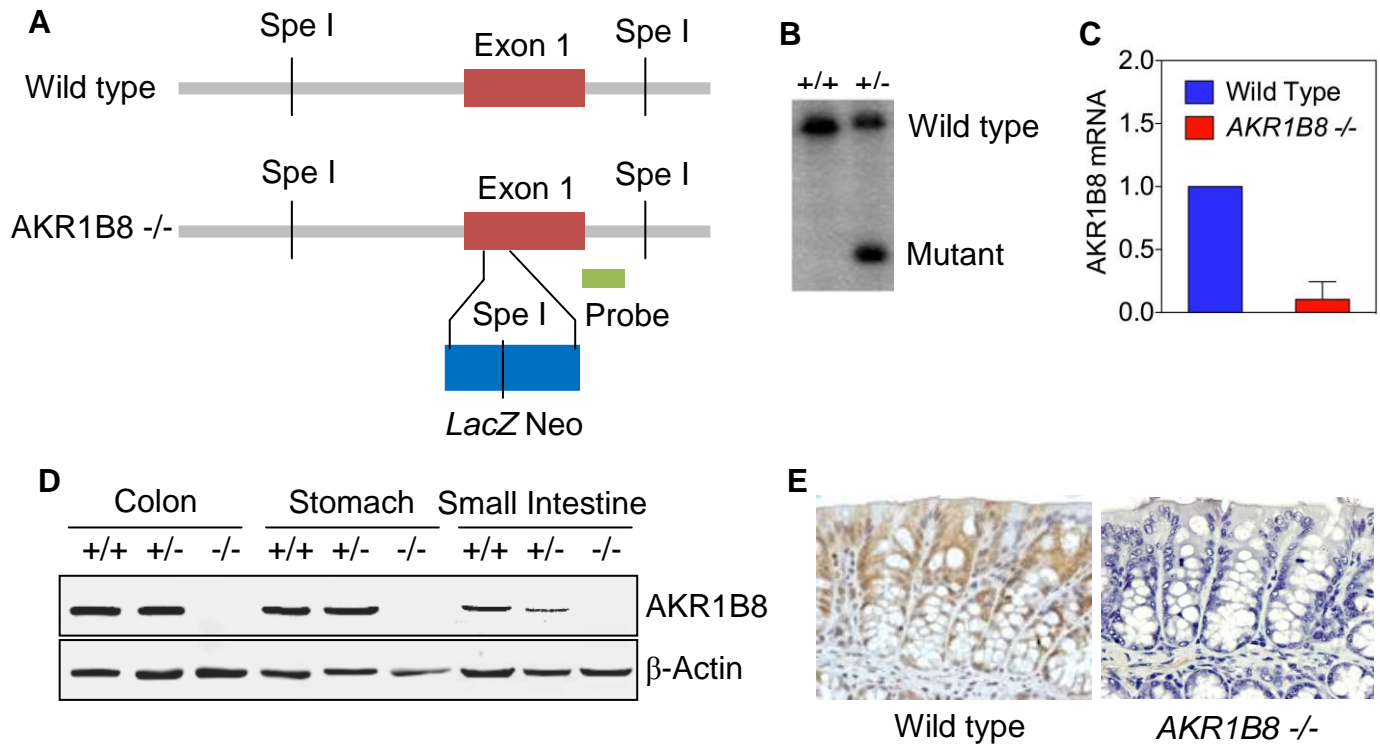

**Figure S1. Targeted disruption of *AKR1B8* gene.** (A) Schematic strategy for disruption of *AKR1B8* gene. Red box denotes Exon 1 of *AKR1B8* gene and blue box indicates LacZ/Neo expression cassette, a selection marker. (B) Southern blot. Mouse genomic DNA was extracted from tails, digested by SpeI, and probed by the DNA probe indicated in (A). (C) *AKR1B8* mRNA level. Data represent mean  $\pm$  SD from three mice. (D) Western blot and (E) Immunohistochemistry, indicating *AKR1B8* protein levels.

**Figure S2**

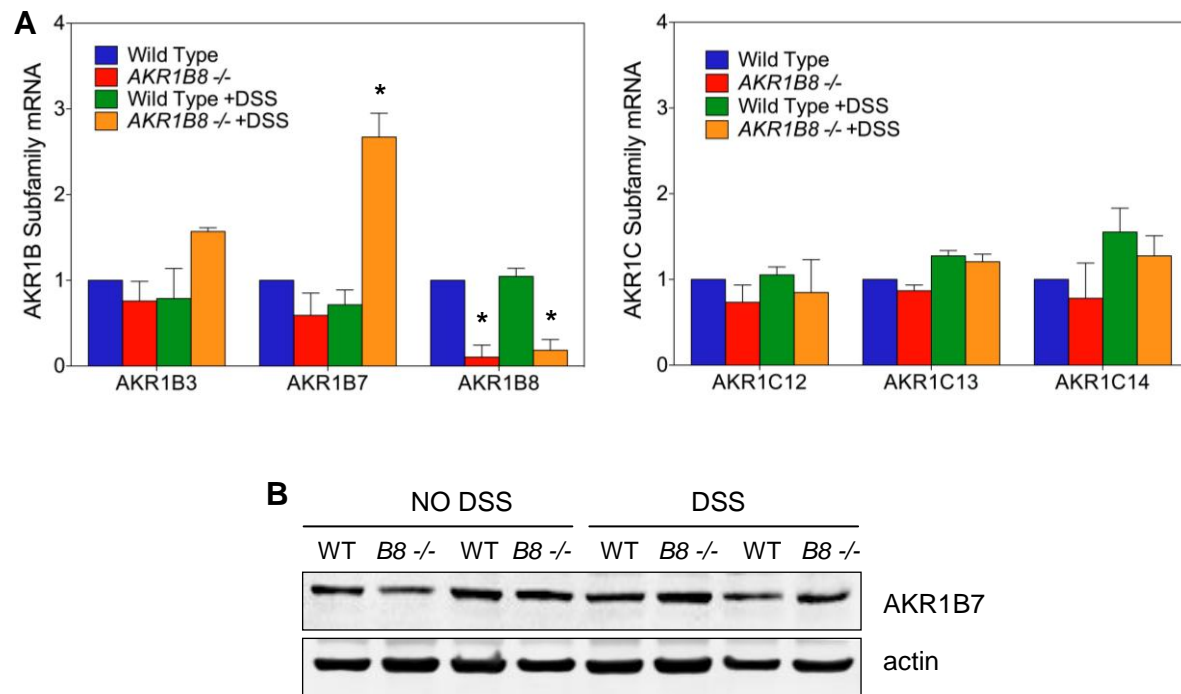

**Figure S2.** *AKR1B* and *AKR1C* subfamily expression. A) *AKR1B* and *AKR1C* subfamily mRNA levels detected by real-time RT-PCR. Data represent mean  $\pm$  SD from three mice. \*  $P < 0.01$ , compared to wild type control. *AKR1B7* was induced by DSS- induced colitis in the *AKR1B8*<sup>-/-</sup> mice. B) Western blot of *AKR1B7*. WT, wild type; B8, *AKR1B8*.

Figure S3

A

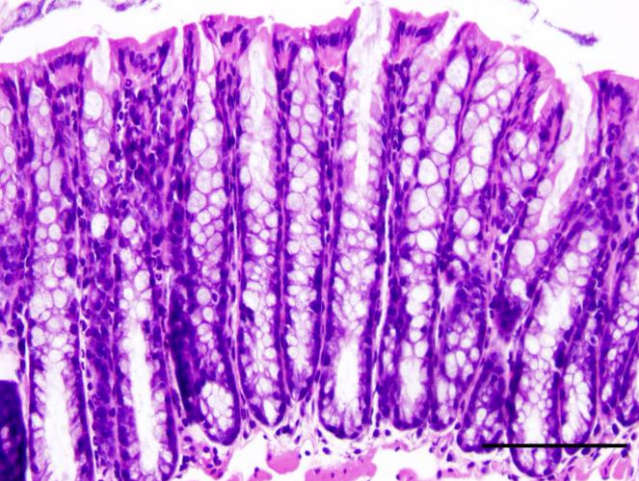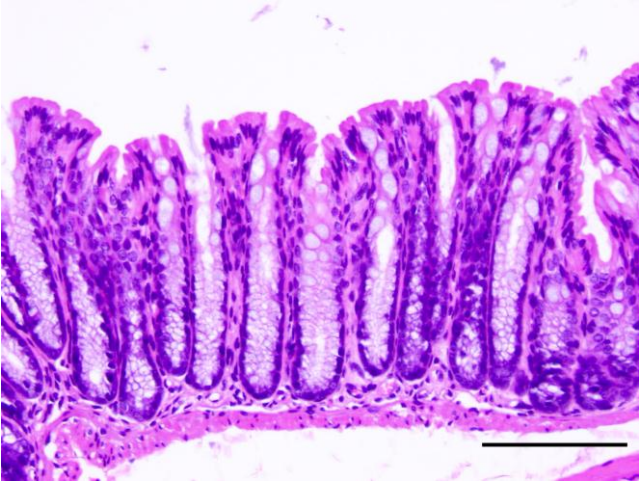

B

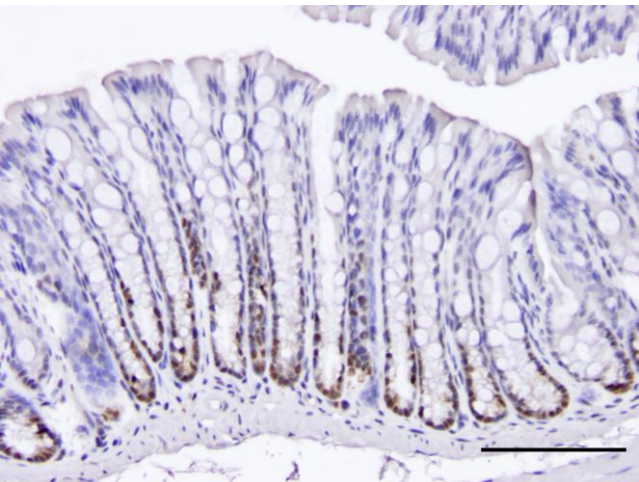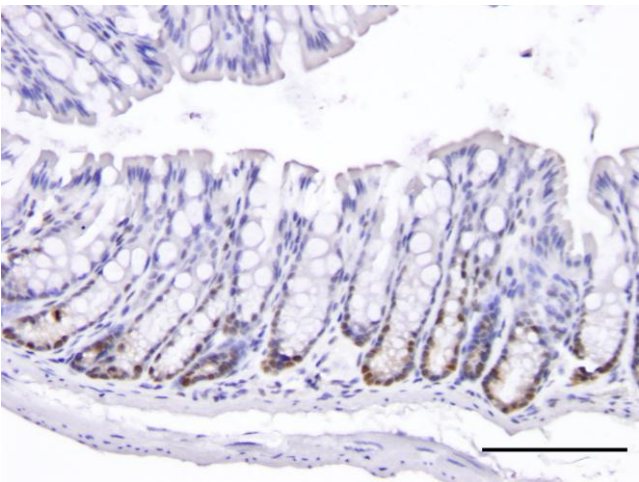

C

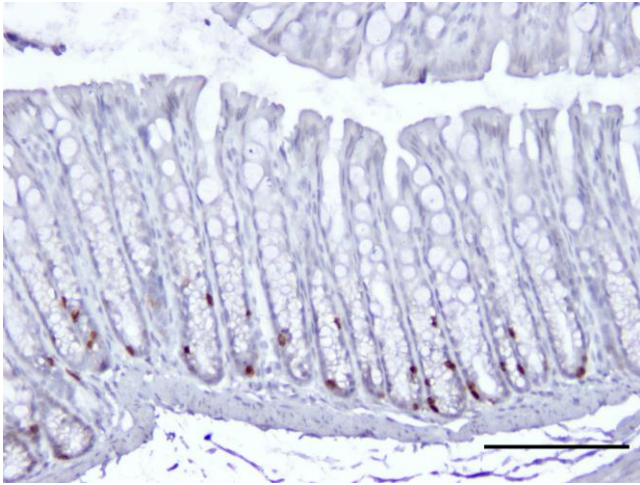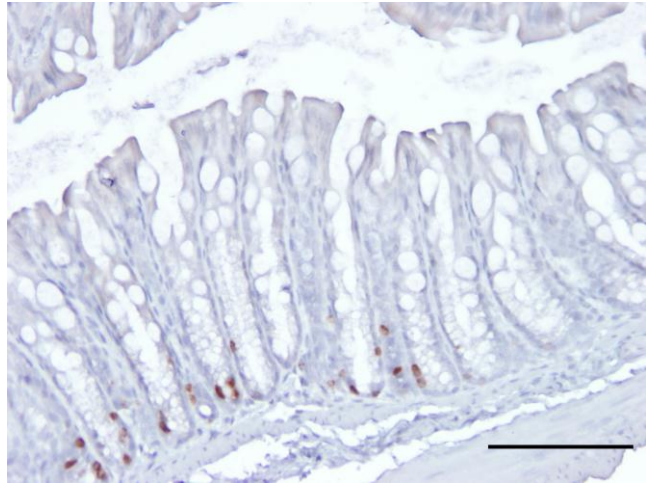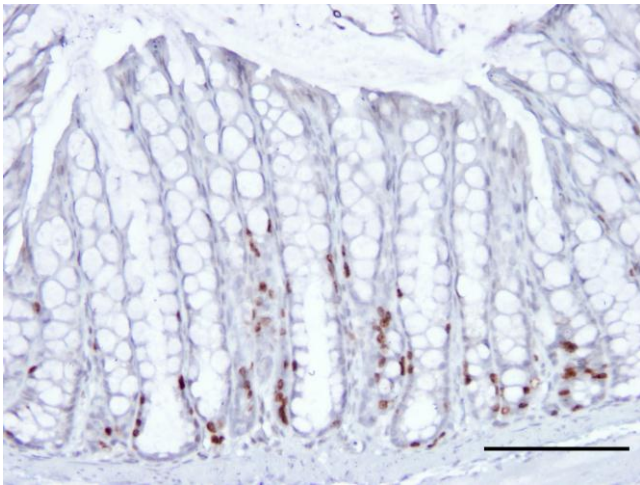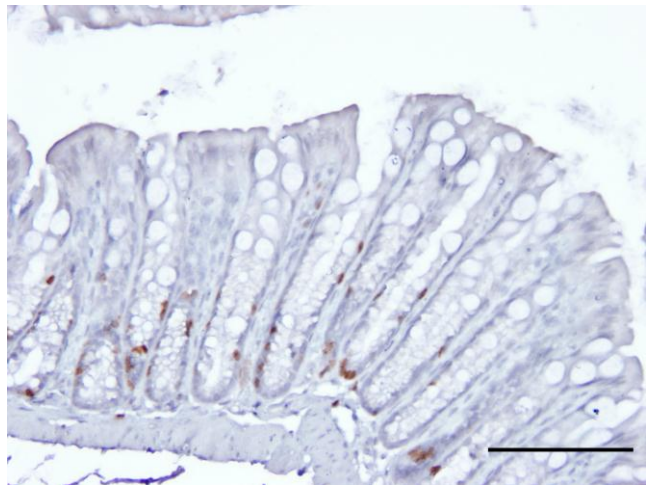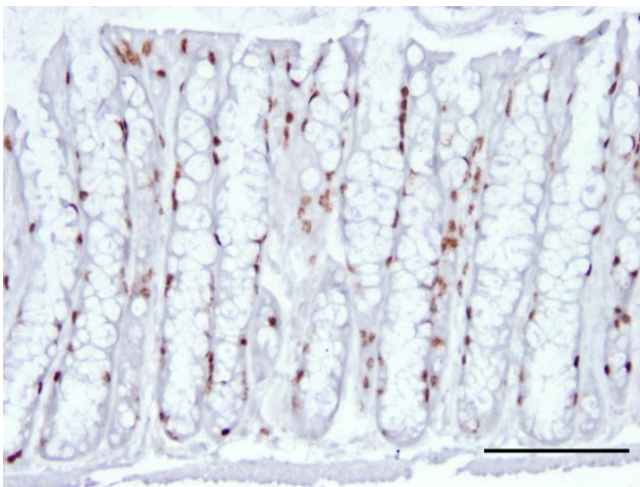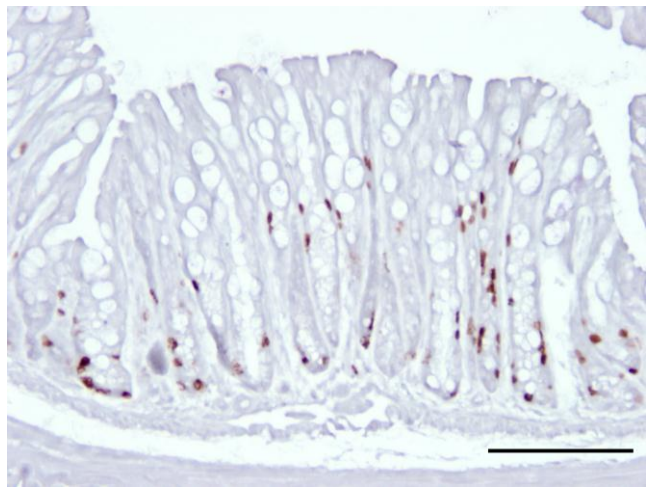

D

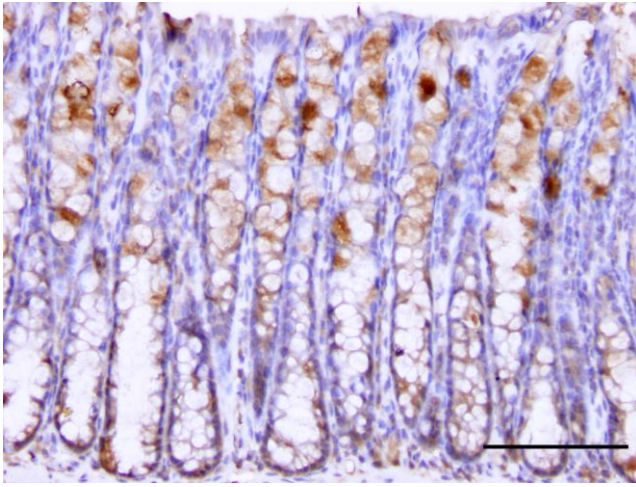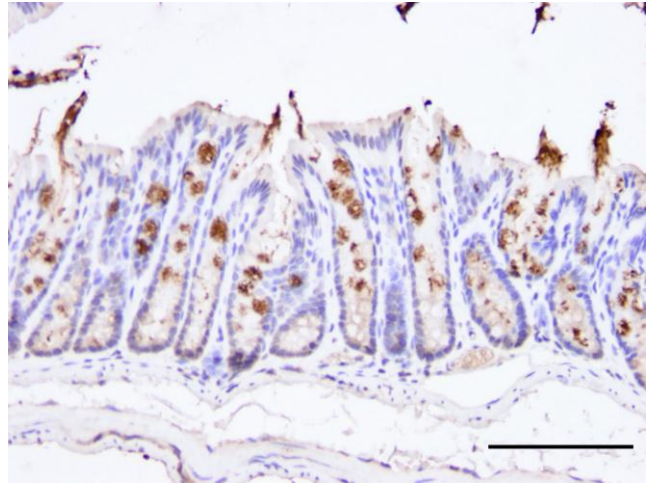

E

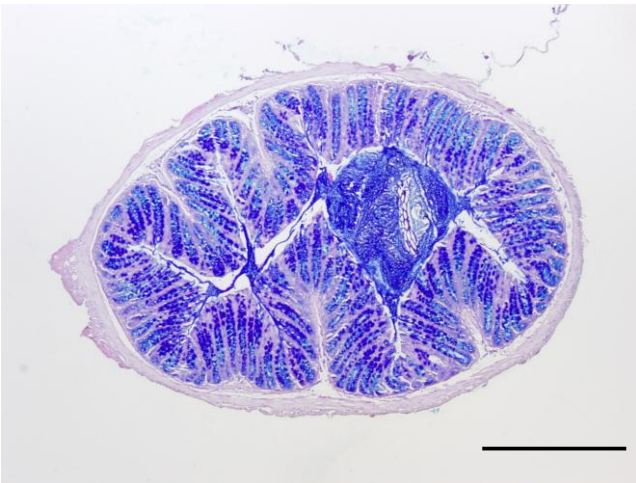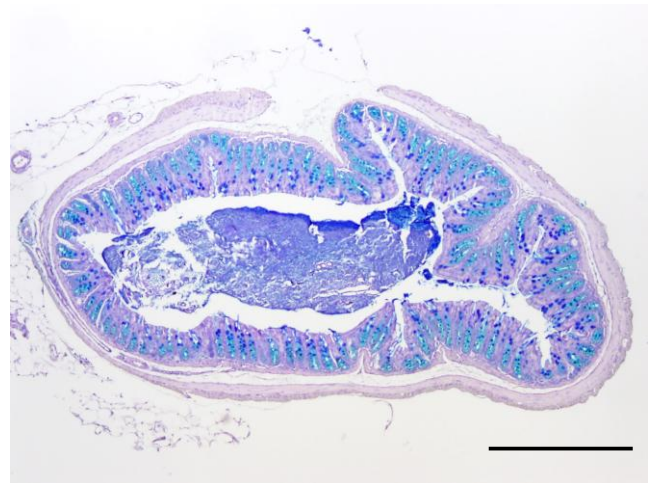

**Figure S3.** Deficiency of proliferation and self-renewal of colonic crypt cells in *AKR1B8*<sup>-/-</sup> mice. A) H & E histology; B) PCNA expression; C) BrdU labeling at 1, 24, and 48 hours; D) ITF expression; and E) Alcian blue and Periodic acid Schiff staining (PAS/AB). Scale bars indicate 50 $\mu$ m in PAS/AB, and 100 $\mu$ m in others.

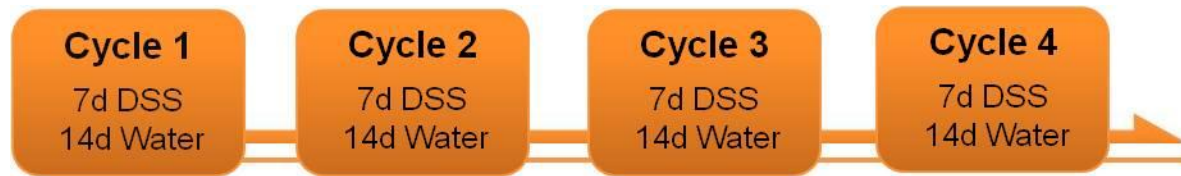

**Figure S4.** DSS treatment schedules. *AKR1B8* <sup>-/-</sup> and wild type mice were fed with 2% dextran sulfate sodium (DSS) for 7 days, followed by 14 days DSS-free water, which is counted as one cycle. Animals experienced one to four cycles depending on experimental needs.

**Figure S5**

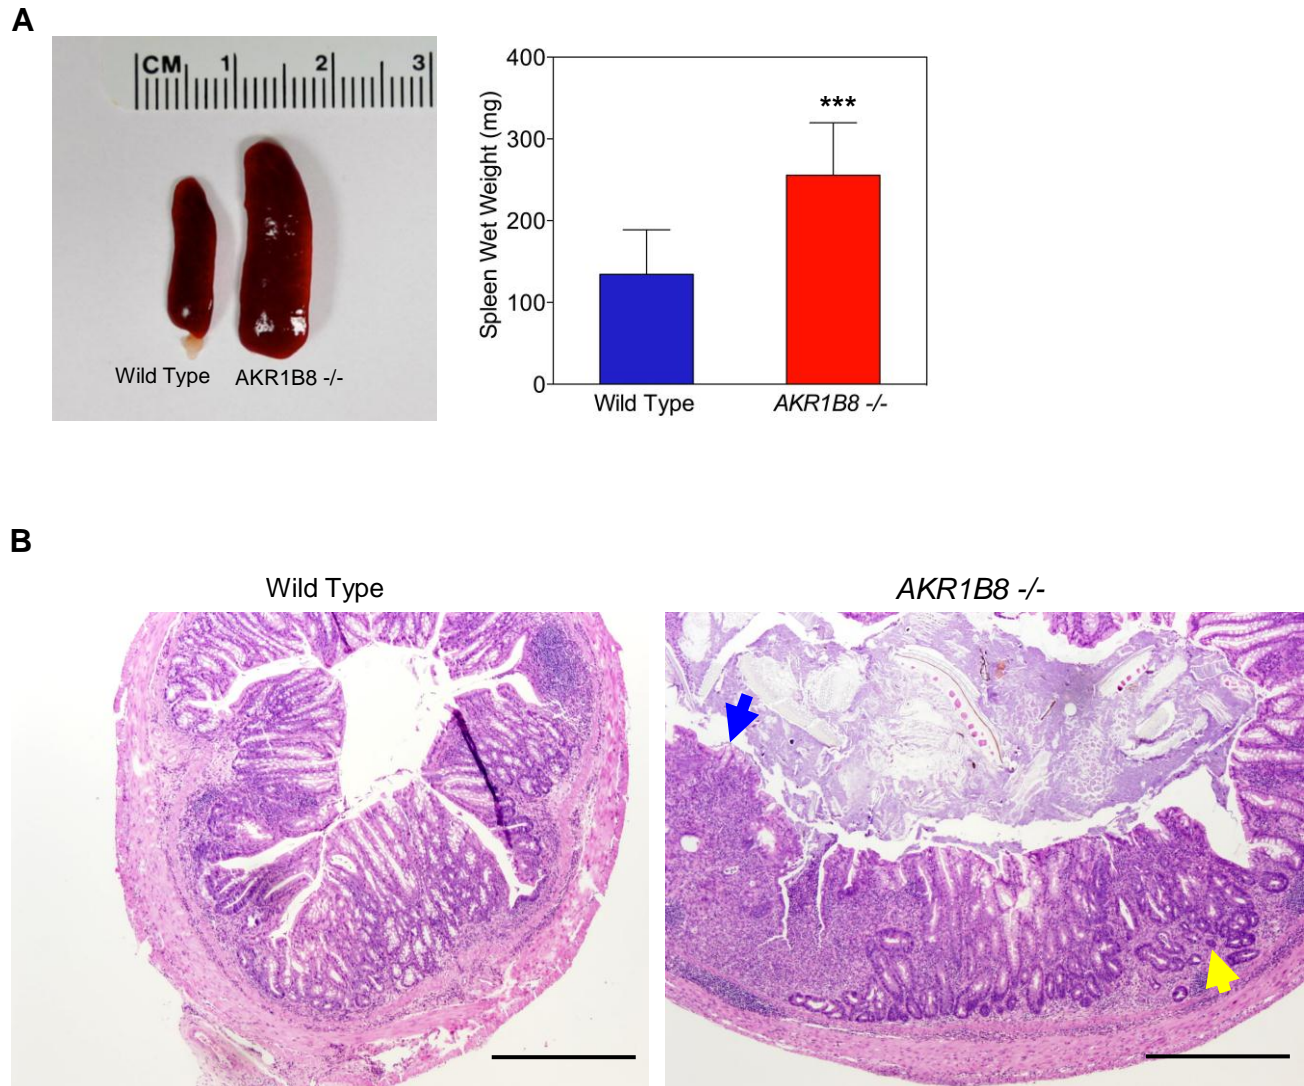

**Figure S5.** Spleen size and histological inflammation of *AKR1B8* <sup>-/-</sup> mice treated with 2% DSS. A) Spleen size. Spleen in *AKR1B8* <sup>-/-</sup> mice was significantly enlarged by >2 fold over that in wild type. Data denote mean  $\pm$  SD, n = 15, \*\*\*  $P < 0.0001$ . B) Histological inflammatory lesions in another representative mouse, showing ulcer (blue arrow). Dysplasia occurred in *AKR1B8* <sup>-/-</sup> mice (white arrow). *AKR1B8* <sup>-/-</sup> mouse colon was swelling and enlarged.



Figure S6

A

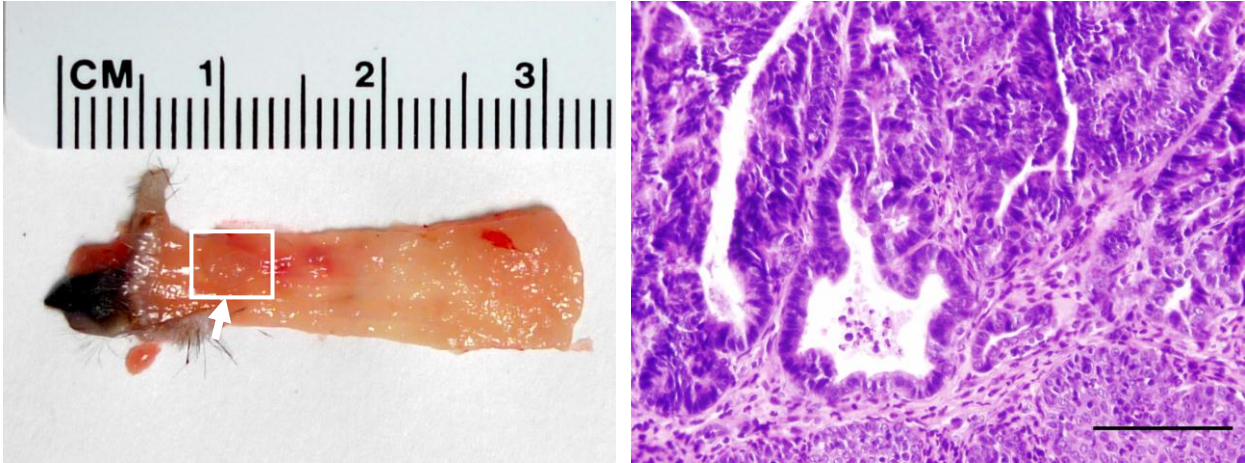

B

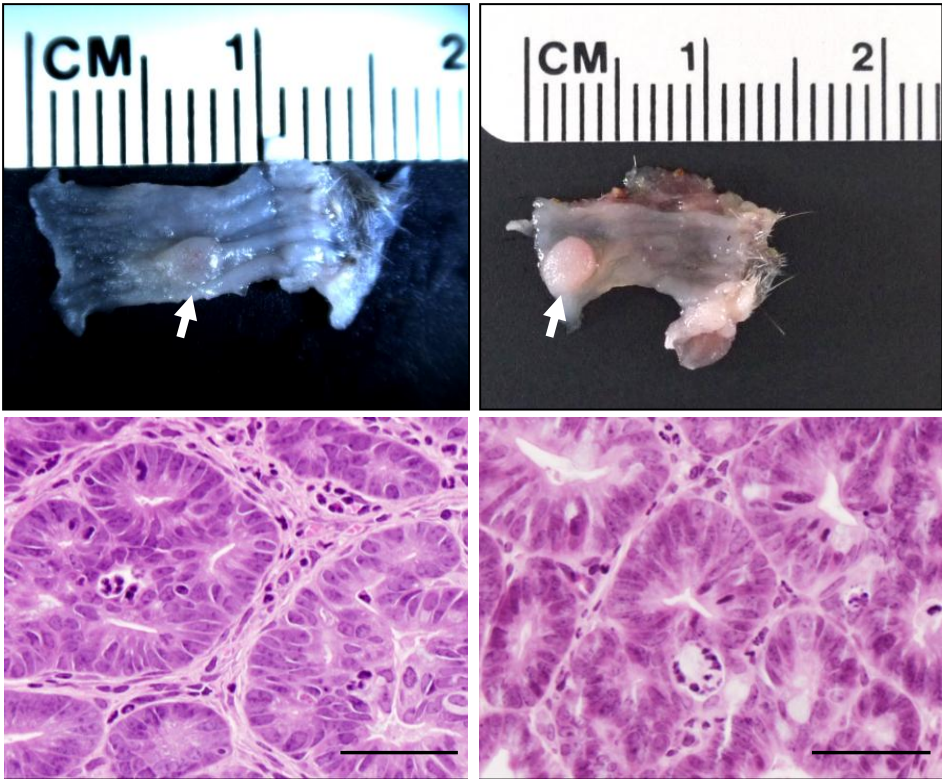

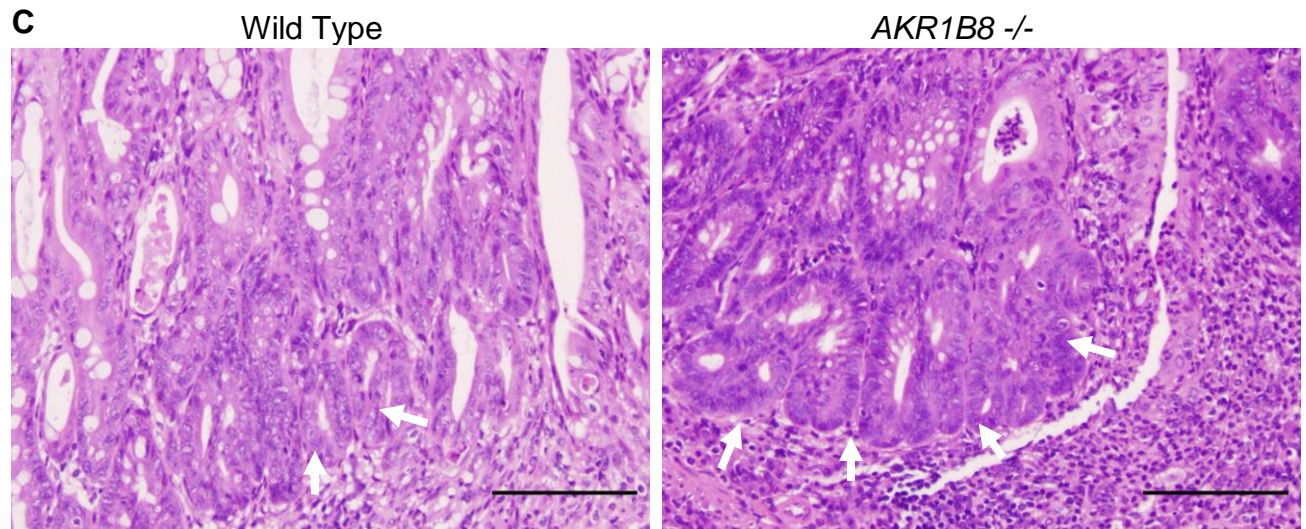

**Figure S6.** Colitis-associated tumorigenesis in *AKR1B8*<sup>-/-</sup> mice. A) A tumor mass (arrow) from an *AKR1B8*<sup>-/-</sup> mouse that received 2 cycles of DSS treatment. *Right:* H & E histology. B) Two more representative palpable tumors (arrows) from *AKR1B8*<sup>-/-</sup> mice received 4 cycles of DSS treatment. *Below:* H & E histology. C) Micro-dysplasias (white arrows). Dysplastic lesions in *AKR1B8*<sup>-/-</sup> mouse were at higher grade than in wild type. Scale bars indicate 200µm in (B), and 100µm in the others.

**Supplemental Table S1.** Coverage summary of Exome sequencing.

| <b>Coverage Summary</b>     | <b>Wild Type</b>       |                        | <b><i>AKR1B8</i> -/-</b> |                        | <b>Tumors</b>          |                        |
|-----------------------------|------------------------|------------------------|--------------------------|------------------------|------------------------|------------------------|
| <b>Reads mapped (%)</b>     | 34,726,317 (95.87)     | 30,643,916 (96.01)     | 37,536,791 (95.55)       | 34,026,043 (95.58)     | 37,781,378 (95.49)     | 32,203,249 (95.66)     |
| Mapped confidently          | 32,112,619 (88.65)     | 28,095,115 (88.02)     | 34,842,474 (88.69)       | 31,287,103 (87.89)     | 34,475,395 (87.13)     | 29,696,048 (88.21)     |
| Mapped repetitively         | 2,613,698 (7.22)       | 2,548,801 (7.99)       | 2,694,317 (6.86)         | 2,738,940 (7.69)       | 3,305,983 (8.36)       | 2,507,201 (7.45)       |
| <b>Reads not mapped (%)</b> | 1,496,567 (4.13)       | 1,274,818 (3.99)       | 1,750,207 (4.45)         | 1,572,689 (4.42)       | 1,785,596 (4.51)       | 1,460,649 (4.34)       |
| No mapping                  | 591,030 (1.63)         | 501,817 (1.57)         | 833,889 (2.12)           | 743,808 (2.09)         | 831,032 (2.10)         | 672,032 (2.00)         |
| Low quality                 | 842,400 (2.33)         | 727,953 (2.28)         | 865,717 (2.20)           | 772,845 (2.17)         | 854,899 (2.16)         | 730,565 (2.17)         |
| Ribosomal RNA               | 4,797 (0.01)           | 4,901 (0.02)           | 4,540 (0.01)             | 4,775 (0.01)           | 4,195 (0.01)           | 3,938 (0.01)           |
| Primer                      | 1,721 (0.00)           | 299 (0.00)             | 856 (0.00)               | 548 (0.00)             | 783 (0.00)             | 611 (0.00)             |
| Control (phiX-174)          | 56,529 (0.16)          | 39,742 (0.12)          | 45,127 (0.11)            | 50,638 (0.14)          | 94,560 (0.24)          | 53,339 (0.16)          |
| Poly-A                      | 46 (0.00)              | 47 (0.00)              | 34 (0.00)                | 40 (0.00)              | 65 (0.00)              | 79 (0.00)              |
| Poly-C                      | 2 (0.00)               | 3 (0.00)               | 3 (0.00)                 | 2 (0.00)               | 3 (0.00)               | 5 (0.00)               |
| Poly-G                      | 0 (0.00)               | 2 (0.00)               | 1 (0.00)                 | 0 (0.00)               | 0 (0.00)               | 0 (0.00)               |
| Poly-T                      | 42 (0.00)              | 54 (0.00)              | 40 (0.00)                | 33 (0.00)              | 59 (0.00)              | 80 (0.00)              |
| <b>Total reads (%)</b>      | 36,222,884 (100.00)    | 31,918,734 (100.00)    | 39,286,998 (100.00)      | 35,598,732 (100.00)    | 39,566,974 (100.00)    | 33,663,898 (100.00)    |
| <b>Total bases (%)</b>      | 3,622,288,400 (100.00) | 3,191,873,400 (100.00) | 3,928,699,800 (100.00)   | 3,559,873,200 (100.00) | 3,956,697,400 (100.00) | 3,366,389,800 (100.00) |

**Supplemental Table S2.** Variations detected throughout the mouse Exome sequencing. Data were broken down by variant types and zygosity. \*,  $P < 0.05$  and \*\*,  $P < 0.01$  compared to wild type. SNP, single nucleotide polymorphisms; MNP, multi-nucleotide polymorphisms.

| <b>Variant Types and Zygosity</b> |                 | <b>Wild Type<br/>(n=2)</b> | <b><i>AKR1B8</i> -/-<br/>(n=2)</b> | <b>Tumors<br/>(n=2)</b> |
|-----------------------------------|-----------------|----------------------------|------------------------------------|-------------------------|
| <b>SNPs</b>                       | Homozygous      | 1470 ± 107                 | 3480 ± 304*                        | 4246 ± 70**             |
|                                   | Heterozygous    | 9330 ± 317                 | 9698 ± 258                         | 9491 ± 202              |
|                                   | <b>Subtotal</b> | <b>10800 ± 421</b>         | <b>13178 ± 93**</b>                | <b>13736 ± 474*</b>     |
| <b>MNPs</b>                       | Homozygous      | 68 ± 1                     | 102 ± 5**                          | 127 ± 8**               |
|                                   | Heterozygous    | 698 ± 59                   | 705 ± 47                           | 760 ± 48                |
|                                   | <b>Subtotal</b> | <b>766 ± 57</b>            | <b>806 ± 52</b>                    | <b>887 ± 57</b>         |
| <b>Insertions</b>                 | Homozygous      | 94 ± 7                     | 146 ± 19                           | 175 ± 3**               |
|                                   | Heterozygous    | 237 ± 11                   | 318 ± 7**                          | 355 ± 23*               |
|                                   | <b>Subtotal</b> | <b>331 ± 4</b>             | <b>464 ± 26**</b>                  | <b>530 ± 25**</b>       |
| <b>Deletions</b>                  | Homozygous      | 142 ± 18                   | 217 ± 28                           | 245 ± 6**               |
|                                   | Heterozygous    | 1496 ± 30                  | 1382 ± 25                          | 1387 ± 99               |
|                                   | <b>Subtotal</b> | <b>1638 ± 12</b>           | <b>1599 ± 53</b>                   | <b>1632 ± 52</b>        |
| <b>Total variant loci</b>         |                 | <b>13533 ± 494</b>         | <b>16046 ± 224*</b>                | <b>16785 ± 660*</b>     |

**Supplemental Table S3.** Oncogenes and tumor suppressor genes mutated in *AKR1B8* <sup>-/-</sup> colitis and tumors only, but not in wild type colitis. Data were produced by Exome sequencing (Otogenetics, GA), n=2 mice each group.

| Gene Name                 | Zygoty | Transcript Name | Mutant Type | Mutant Numbers | Original AA | Mutant AA | Function                                | Ref  |
|---------------------------|--------|-----------------|-------------|----------------|-------------|-----------|-----------------------------------------|------|
| Abtb1                     | Het    | NM_030251       | Non-Synonym | 1              | Y           | H         | Tumor suppressor                        | (50) |
| Chd5                      | Het    | NM_001081376    | Non-Synonym | 1              | R           | L         | Tumor suppressor                        | (51) |
| Chl1                      | Hom    | NM_007697       | Non-Synonym | 3              | S           | A         | Tumor suppressor                        | (52) |
| Chn2                      | Hom    | NM_023543       | Non-Synonym | 1              | M           | V         | Tumor suppressor                        | (53) |
| Dfna5                     | Hom    | NM_018769       | Non-Synonym | 1              | L           | P         | Tumor suppressor                        | (54) |
| Dlx5                      | Hom    | NM_010056       | Frameshift  | 4              |             |           | Oncogene                                | (55) |
| Dok1                      | Hom    | NM_010070       | Non-Synonym | 1              | V           | A         | Tumor suppressor                        | (56) |
| Fam176a                   | Hom    | NM_145570       | Non-Synonym | 1              | P           | S         | Tumor suppressor                        | (57) |
| Fbxo5                     | Het    | NM_025995       | Non-Synonym | 2              | F           | C         | Tumor suppressor                        | (58) |
| Fgd5                      | Hom    | NM_172731       | Non-Synonym | 1              | Q           | R         | Oncogene                                | (59) |
| Fhl3                      | Het    | NM_010213       | Frameshift  | 1              |             |           | Tumor suppressor                        | (60) |
|                           | Het    |                 | Non-Synonym | 3              | C           | Y         |                                         |      |
| Herc5                     | Hom    | NM_025992       | Non-Synonym | 19             | S           | G         | E3 protein ligase; Oncogene?            | (61) |
|                           | Hom    |                 | Stop Gain   | 1              | Q           | *         |                                         |      |
| Hoxa10                    | Hom    | NM_008263       | Non-Synonym | 1              | V           | G         | Transcription factor, tumor suppressor? | (62) |
| Hoxa13                    | Hom    | NM_008264       | Non-Synonym | 1              | R           | A         | Transcription factor, oncogene?         | (63) |
| Hoxa5                     | Hom    | NM_010453       | Non-Synonym | 1              | A           | V         | Transcription factor, tumor suppressor? | (64) |
| L3mbtl4                   | Het    | NM_177278       | Non-Synonym | 1              | E           | G         | Transcription factor, tumor suppressor  | (65) |
| Lrig1                     | Het    | NM_008377       | Non-Synonym | 1              | A           | T         | Tumor suppressor                        | (66) |
| Mktn1                     | Hom    | NM_018810       | Non-Synonym | 1              | N           | Y         | E3 ubiquitin ligase, oncogene?          | (67) |
| Mxd1                      | Hom    | NM_010751       | Non-Synonym | 1              | S           | G         | Tumor suppressor                        | (68) |
| NSPC1                     | Hom    | NM_197992       | Non-Synonym | 1              | R           | C         | Transcription factor, oncogenic         | (69) |
| Pdzk1                     | Het    | NM_001146001    | Non-Synonym | 2              | N           | D         | Oncogenic                               | (70) |
| PP2Cm                     | Hom    | NM_175523       | Non-Synonym | 2              | S           | L         | Cell death/survival                     | (71) |
| Rtkn                      | Hom    | NM_001136227    | Non-Synonym | 3              | A           | V         | A scaffold protein, oncogenic?          | (72) |
| Samd9l                    | Hom    | NM_010156       | Non-Synonym | 2              | I           | V         | oncogene                                | (73) |
| Smo                       | Hom    | NM_176996       | Non-Synonym | 2              | D           | N         | Tumor suppressor                        | (74) |
| ECRG2                     | Het    | NM_001001803    | Non-Synonym | 1              | C           | S         | Tumor suppressor                        | (75) |
| AMSH                      | Hom    | NM_024239       | Non-Synonym | 1              | V           | I         | Cytokine signaling, oncogenic           | (76) |
| Sulf1                     | Het    | NM_172294       | Non-Synonym | 1              | D           | N         | Tumor suppressor                        | (77) |
| <b>Subtotal: 28 genes</b> |        |                 |             |                |             |           |                                         |      |

**Supplemental Table S4.** Disease Activity Index

| <b>Score</b> | <b>Weight loss (%)</b> | <b>Stool consistency</b>                                      | <b>Occult/gross blood in stools</b> |
|--------------|------------------------|---------------------------------------------------------------|-------------------------------------|
| 0            | $\leq 1$               | Normal stool (well-formed pellets)                            | Normal (no blood in stools)         |
| 1            | $1 < \leq 5$           |                                                               |                                     |
| 2            | $5 < \leq 10$          | Loose stools (pasty and semi-formed, not adhered to the anus) | Positive occult blood in stools     |
| 3            | $10 < \leq 20$         |                                                               |                                     |
| 4            | $20 <$                 | Diarrhea (liquid, adhered to the anus)                        | Gross bleeding in stools            |

**Supplemental Table S5.** Histopathological Inflammation Score

| <b>Score</b> | <b>Epithelial Damage (E)</b>        | <b>Infiltration (I)</b>                                                                              |
|--------------|-------------------------------------|------------------------------------------------------------------------------------------------------|
| 0            | Normal morphology                   | No infiltrate                                                                                        |
| 1            | Loss of goblet cells                | Infiltrate around crypt basis                                                                        |
| 2            | Loss of goblet cells in large areas | Infiltrate reaching to muscularis mucosa                                                             |
| 3            | Loss of crypts                      | Extensive infiltration reaching the muscularis mucosa, thickening of the mucosa with abundant oedema |
| 4            | Loss of crypts in large area        | Infiltration of the submucosa                                                                        |

**Supplemental Table S6.** Definition of histopathology.

---

| <b>Histopathology</b>         |                                                                                                                                                                                                                                                                                                                                                                                             |
|-------------------------------|---------------------------------------------------------------------------------------------------------------------------------------------------------------------------------------------------------------------------------------------------------------------------------------------------------------------------------------------------------------------------------------------|
| Regenerative mucosa           | Regenerative mucosa is usually due to damage (ulceration). In the background, there are some changes indicating the prior damages, such as thrombus formation/ hyaline thrombus in small vessels, necrosis, ulceration, granulation tissue, fibrin, hemosiderin/hemorrhage, edema in lamina propria, and inflammatory exudate (early) or stromal fibrosis (late).                           |
| Hyperplasia without dysplasia | Elongated glands/crypts usually with serrated lumen, mixed goblet cells and absorptive cells, bland cytology (no atypia) with brush borders and basal nuclei, the basement membrane is usually thickened, cells at the base of crypt are a little bit immature including nuclear elongation, crowding and increased mitotic rate, but this is not present at the top of crypt (maturation). |
| Mild dysplasia                | Pseudostratification of nuclei that reach only half of the cell, apical mucin is present, nuclei are elongated and hyperchromatic. Mitotic activity present but atypical mitosis and loss of polarity are absent or minimal.                                                                                                                                                                |
| Moderate dysplasia            | Changes are between mild and high grade dysplasia.                                                                                                                                                                                                                                                                                                                                          |
| Severe dysplasia              | Cytological changes: nuclei are rounded, hyperchromatic or vesicular with prominent nucleoli; nuclei are stratified and reach luminal surface. Architectural changes: back to back glands, cribriform, mitotic and atypical mitotic figures are prominent with reduced mucin.                                                                                                               |
| Adenoma                       | Dome-shaped elevated lesions with mild dysplasia.                                                                                                                                                                                                                                                                                                                                           |

---



**Supplemental Table S7.** Gene specific primers.

| <b>Gene Description</b> | <b>Primers</b> | <b>Sequence (5' → 3')</b>      |
|-------------------------|----------------|--------------------------------|
| AKR1B3                  | Forward primer | CAA CAG GAA CTG GAG GGT GTG    |
|                         | Reverse primer | GAA CAG GTG CAA GCC ACT TG     |
| AKR1B7                  | Forward primer | GAT CCC CAA GTC TGT GAC AC     |
|                         | Reverse primer | CAG TCC TTG CAT CCA ACA G      |
| AKR1B8                  | Forward primer | CAT CCT TAC CTC ACC CAG GA     |
|                         | Reverse primer | GAT CAC CAC CAC GTT CCT CT     |
| AKR1C12                 | Forward primer | GAC ACA TGG GAG AGG TTG GAG    |
|                         | Reverse primer | GTC CTG GCT TGT TGA GGA TTC    |
| AKR1C13                 | Forward primer | CCT TGT TGA CCA CCC AGA G      |
|                         | Reverse primer | CTG TCC ACA CAC AGG GAC AC     |
| AKR1C14                 | Forward primer | GGA GGC CAT GGA AAA GTG TA     |
|                         | Reverse primer | GAT GGC ATT CTA CCT GGT TGC    |
| IL-1 $\beta$            | Forward primer | GCA ACT GTT CCT GAA CTC AAC    |
|                         | Reverse primer | ATC TTT TGG GGT CCG TCA ACT    |
| IL-6                    | Forward primer | TAG TCC TTC CTA CCC CAA TTT CC |
|                         | Reverse primer | TTG GTC CTT AGC CAC TCC TTC    |
| IFN $\gamma$            | Forward primer | GCG TCA TTG AAT CAC ACC TG     |
|                         | Reverse primer | GAC CTG TGG GTT GTT GAC C      |
| IKK $\beta$             | Forward primer | CTG AAG ATC GCC TGT AGC AAA    |
|                         | Reverse primer | TCC ATC TGT AAC CAG CTC CAG    |

## References

50. Unoki M, Nakamura Y. Growth-suppressive effects of BPOZ and EGR2, two genes involved in the PTEN signaling pathway. *Oncogene*. 2001;20:4457-65.
51. Bagchi A, Papazoglu C, Wu Y, Capurso D, Brodt M, Francis D, et al. CHD5 is a tumor suppressor at human 1p36. *Cell*. 2007;128:459-75.
52. Senchenko VN, Krasnov GS, Dmitriev AA, Kudryavtseva AV, Anedchenko EA, Braga EA, et al. Differential expression of CHL1 gene during development of major human cancers. *PloS one*. 2011;6:e15612.
53. Bruinsma SP, Baranski TJ. Beta2-chimaerin in cancer signaling: connecting cell adhesion and MAP kinase activation. *Cell cycle (Georgetown, Tex)*. 2007;6:2440-4.
54. Van Rossom S, Op de Beeck K, Franssens V, Swinnen E, Schepers A, Ghillebert R, et al. The splicing mutant of the human tumor suppressor protein DFNA5 induces programmed cell death when expressed in the yeast *Saccharomyces cerevisiae*. *Frontiers in oncology*. 2012;2:77.
55. Xu J, Testa JR. DLX5 (distal-less homeobox 5) promotes tumor cell proliferation by transcriptionally regulating MYC. *J Biol Chem*. 2009;284:20593-601.
56. Mercier PL, Bachvarova M, Plante M, Gregoire J, Renaud MC, Ghani K, et al. Characterization of DOK1, a candidate tumor suppressor gene, in epithelial ovarian cancer. *Mol Oncol*. 2011;5:438-53.
57. Xie H, Hu J, Pan H, Lou Y, Lv P, Chen Y. Adenovirus vector-mediated FAM176A overexpression induces cell death in human H1299 non-small cell lung cancer cells. *BMB reports*. 2014;47:104-9.
58. Wang Z, Liu P, Inuzuka H, Wei W. Roles of F-box proteins in cancer. *Nat Rev Cancer*. 2014;14:233-47.

59. Nakhaei-Nejad M, Haddad G, Zhang QX, Murray AG. Facio-genital dysplasia-5 regulates matrix adhesion and survival of human endothelial cells. *Arteriosclerosis, thrombosis, and vascular biology*. 2012;32:2694-701.
60. Niu C, Yan Z, Cheng L, Zhu J, Zhang H, Xu X, et al. Downregulation and antiproliferative role of FHL3 in breast cancer. *IUBMB life*. 2011;63:764-71.
61. Mitsui K, Nakanishi M, Ohtsuka S, Norwood TH, Okabayashi K, Miyamoto C, et al. A novel human gene encoding HECT domain and RCC1-like repeats interacts with cyclins and is potentially regulated by the tumor suppressor proteins. *Biochem Biophys Res Commun*. 1999;266:115-22.
62. Chu MC, Selam FB, Taylor HS. HOXA10 regulates p53 expression and matrigel invasion in human breast cancer cells. *Cancer biology & therapy*. 2004;3:568-72.
63. Gu ZD, Shen LY, Wang H, Chen XM, Li Y, Ning T, et al. HOXA13 promotes cancer cell growth and predicts poor survival of patients with esophageal squamous cell carcinoma. *Cancer Res*. 2009;69:4969-73.
64. Chen H, Chung S, Sukumar S. HOXA5-induced apoptosis in breast cancer cells is mediated by caspases 2 and 8. *Mol Cell Biol*. 2004;24:924-35.
65. Addou-Klouche L, Adelaide J, Finetti P, Cervera N, Ferrari A, Bekhouche I, et al. Loss, mutation and deregulation of L3MBTL4 in breast cancers. *Mol Cancer*. 2010;9:213.
66. Johansson M, Oudin A, Tiemann K, Bernard A, Golebiewska A, Keunen O, et al. The soluble form of the tumor suppressor Lrig1 potently inhibits in vivo glioma growth irrespective of EGF receptor status. *Neuro-oncology*. 2013;15:1200-11.

67. Ko A, Shin JY, Seo J, Lee KD, Lee EW, Lee MS, et al. Acceleration of gastric tumorigenesis through MKRN1-mediated posttranslational regulation of p14ARF. *J Natl Cancer Inst.* 2012;104:1660-72.
68. Wu Q, Yang Z, An Y, Hu H, Yin J, Zhang P, et al. MiR-19a/b modulate the metastasis of gastric cancer cells by targeting the tumour suppressor MXD1. *Cell death & disease.* 2014;5:e1144.
69. Gong Y, Yue J, Wu X, Wang X, Wen J, Lu L, et al. NSPc1 is a cell growth regulator that acts as a transcriptional repressor of p21Waf1/Cip1 via the RARE element. *Nucleic Acids Res.* 2006;34:6158-69.
70. Kim H, Abd Elmageed ZY, Ju J, Naura AS, Abdel-Mageed AB, Varughese S, et al. PDZK1 is a novel factor in breast cancer that is indirectly regulated by estrogen through IGF-1R and promotes estrogen-mediated growth. *Molecular medicine (Cambridge, Mass.* 2013;19:253-62.
71. Lu G, Ren S, Korge P, Choi J, Dong Y, Weiss J, et al. A novel mitochondrial matrix serine/threonine protein phosphatase regulates the mitochondria permeability transition pore and is essential for cellular survival and development. *Genes Dev.* 2007;21:784-96.
72. Wang S, Bian C, Yang Z, Bo Y, Li J, Zeng L, et al. miR-145 inhibits breast cancer cell growth through RTKN. *Int J Oncol.* 2009;34:1461-6.
73. Nagamachi A, Matsui H, Asou H, Ozaki Y, Aki D, Kanai A, et al. Haploinsufficiency of SAMD9L, an endosome fusion facilitator, causes myeloid malignancies in mice mimicking human diseases with monosomy 7. *Cancer Cell.* 2013;24:305-17.

74. Brastianos PK, Horowitz PM, Santagata S, Jones RT, McKenna A, Getz G, et al. Genomic sequencing of meningiomas identifies oncogenic SMO and AKT1 mutations. *Nat Genet.* 2013;45:285-9.
75. Cui Y, Wang J, Zhang X, Lang R, Bi M, Guo L, et al. ECRG2, a novel candidate of tumor suppressor gene in the esophageal carcinoma, interacts directly with metallothionein 2A and links to apoptosis. *Biochem Biophys Res Commun.* 2003;302:904-15.
76. Tanaka N, Kaneko K, Asao H, Kasai H, Endo Y, Fujita T, et al. Possible involvement of a novel STAM-associated molecule "AMSH" in intracellular signal transduction mediated by cytokines. *J Biol Chem.* 1999;274:19129-35.
77. Lai JP, Sandhu DS, Shire AM, Roberts LR. The tumor suppressor function of human sulfatase 1 (SULF1) in carcinogenesis. *Journal of gastrointestinal cancer.* 2008;39:149-58.
